# Supplementary material
Source: PubMed Central journal article supplement (PMC8902438)

## SUPPLEMENTARY MATERIALS

**Supplementary Table 1.** Clinical-pathological characteristics between the cohort of patients with CeLTIL and the cohort of patients without the CeLTIL data from the NeoALTTO trial<sup>a</sup>

|                                                        | CeLTIL evaluable (n=196) | CeLTIL non-evaluable (n=107) | <i>P</i> (evaluable vs non-evaluable)                             |
|--------------------------------------------------------|--------------------------|------------------------------|-------------------------------------------------------------------|
| Age at diagnosis, median (range), years                | 49 (23-75)               | 50 (25-80)                   | 0.526 (Man-Wilcoxon)                                              |
| Pre-treatment tumor size                               |                          |                              |                                                                   |
| T2                                                     | 117 (59.7%)              | 67 (62.6%)                   | 0.708 (Chi-square)                                                |
| ≥ T3                                                   | 79 (40.3%)               | 40 (37.4%)                   |                                                                   |
| Pre-treatment nodal status                             |                          |                              |                                                                   |
| N0/1                                                   | 166 (84.7%)              | 90 (84.1%)                   | 1.000 (Chi-square)                                                |
| ≥ N2, Nx or missing                                    | 30 (15.3%)               | 17 (15.9%)                   |                                                                   |
| Hormone receptor status                                |                          |                              |                                                                   |
| Positive                                               | 106 (54.1%)              | 46 (43%)                     | 0.084 (Chi-square)                                                |
| Negative                                               | 90 (45.9%)               | 61 (57%)                     |                                                                   |
| pCR status (note – some cases have unknown pCR status) |                          |                              |                                                                   |
| Yes                                                    | 56 (28.6%)               | 52 (48.6%)                   | 0.001 (logistic regression stratified by hormone receptor status) |
| No                                                     | 134 (68.4%)              | 51 (47.7%)                   |                                                                   |
| Unknown                                                | 6 (3%)                   | 4 (3.7%)                     |                                                                   |
| EFS events                                             | 60 (30.7%)               | 24 (22.4%)                   | 0.218 (log-rank)                                                  |
| Deaths                                                 | 36 (18.4%)               | 17 (15.9%)                   | 0.721 (log-rank)                                                  |

<sup>a</sup>All cases from the lapatinib-only arm are excluded. EFS = event-free survival, pCR = pathological complete response.

**Supplementary Table 2.** Multivariate Cox proportional hazards models for event-free survival and overall survival<sup>a</sup>

|                         | HR (95% CI)        | <i>P</i> |
|-------------------------|--------------------|----------|
| Event-free survival     |                    |          |
| CelTIL score            | 0.40 (0.17 – 0.94) | 0.04     |
| Baseline TILs (per 10%) | 0.73 (0.57-0.94)   | 0.01     |
| Pre-NAC tumor size      | 0.81 (0.46-1.44)   | 0.47     |
| Pre-NAC nodal status    | 1.11 (0.45-2.69)   | 0.83     |
| HR status               | 0.76 (0.43 – 1.35) | 0.35     |
| Planned surgery         | 1.05 (0.56-1.99)   | 0.87     |
| pCR status              | 0.61 (0.3-1.23)    | 0.17     |
| Treatment arm           | 0.82 (0.46-1.49)   | 0.52     |
| Overall survival        |                    |          |
| CelTIL score            | 0.43 (0.20-0.92)   | 0.03     |
| Baseline TILs (per 10%) | 0.85 (0.64-1.13)   | 0.26     |
| Pre-NAC tumor size      | 0.46 (0.21-0.98)   | 0.04     |
| Pre-NAC nodal status    | 0.8 (0.26-2.46)    | 0.70     |
| HR status               | 0.67 (0.31-1.46)   | 0.32     |
| Planned surgery         | 1.69 (0.63-4.58)   | 0.30     |
| pCR status              | 0.38 (0.13-1.15)   | 0.09     |
| Treatment arm           | 0.57 (0.25-1.3)    | 0.18     |

<sup>a</sup> CI = confidence interval; HR = hazard ratio; pCR = pathological complete response

**Supplementary Table 3.** Relationship between tumor infiltrating lymphocytes (TILs) at week 2 and tumor cellularity at week 2 and outcome<sup>a</sup>

|                                      | Event-Free Survival |          | Overall Survival |          |
|--------------------------------------|---------------------|----------|------------------|----------|
|                                      | HR (95% CI)         | <i>P</i> | HR (95% CI)      | <i>P</i> |
| TILs (per 10% increment)             | 0.79 (0.68-0.92)    | 0.002    | 0.88 (0.75-1.03) | 0.11     |
| Tumor cellularity (per 1% increment) | 1 (0.99-1.01)       | 0.60     | 1.01 (1-1.02)    | 0.16     |

<sup>a</sup>HR = hazard ratio; CI = confidence interval

**Supplementary Figure 1.** Survival outcomes in NeoALTTO based on CelTIL score. **(A)** OS in patients with a pCR; **(B)** OS in patients with a non-pCR. Estimates of EFS and OS were from Kaplan-Meier curves and tests of differences by cox proportional hazard model. All statistical tests were two sided. EFS =Event-free survival; OS = Overall Survival; HR = Hazard Ratio; CI = Confident Interval.

A.

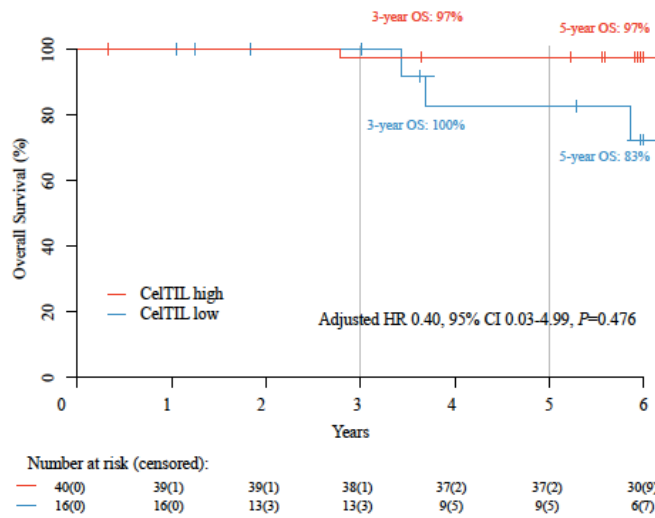

B.

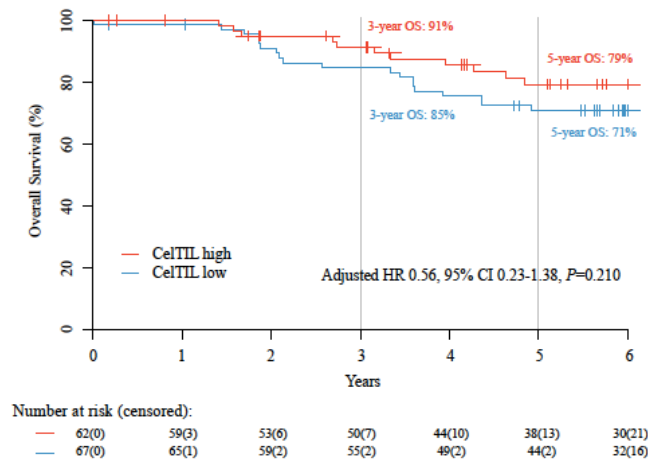

Supplement: djab057_supplementary_data.pdf [file djab057_supplementary_data.pdf]
